# Supplementary material
Source: Royal Society of Chemistry journal article supplement (doi:10.1039/d6se00117c)
Supplement: d6se00117c1.pdf [file d6se00117c1.pdf]

## Supplementary Information

# **Triboelectric Charge-Enhanced Rolling-Structured Triboelectric Nanogenerator via Ternary Triboelectric Interface for Wave Energy Harvesting and Marine Sensing**

Yuwei Ma<sup>a, b</sup>, Mengfan Li<sup>a, b</sup>, Ying Lou<sup>a, b</sup>, Jiayi Hu<sup>a, c</sup>, Guangli Zhang<sup>a, c</sup>,  
Yaya Xu<sup>a, c</sup>, Aifang Yu<sup>a, b, c, \*</sup>, and Junyi Zhai<sup>a, b, c, \*</sup>

<sup>a</sup>Beijing Key Laboratory of Micro-Nano Energy and Sensor, Center for High-Entropy Energy and Systems, Beijing Institute of Nanoenergy and Nanosystems, Chinese Academy of Sciences, Beijing 101400, P. R. China

<sup>b</sup>School of Nanoscience and Engineering, University of Chinese Academy of Sciences, Beijing 100049, China

<sup>c</sup>Center on Nanoenergy Research, Institute of Science and Technology for Carbon Peak & Neutrality; Key Laboratory of Blue Energy and Systems Integration (Guangxi University), Education Department of Guangxi Zhuang Autonomous Region; School of Physical Science & Technology, Guangxi University, Nanning 530004, China

\*Corresponding authors at: Beijing Key Laboratory of Micro-Nano Energy and Sensor, Center for High-Entropy Energy and Systems, Beijing Institute of Nanoenergy and Nanosystems, Chinese Academy of Sciences, Beijing 101400, P. R. China

E-mail addresses: yuaifang@binn.cas.cn (A. Yu), jyzhai@binn.cas.cn (J. Zhai).

**Table S1.** Comparison of the output characteristics between this work and previous devices.<sup>1,2</sup>

| Device                | Volume                            | Peak Power Density                    | Average Power Density                 | Matched Impedance | Ref              |
|-----------------------|-----------------------------------|---------------------------------------|---------------------------------------|-------------------|------------------|
| RS-TENG               | $3.1 \times 10^{-4} \text{ m}^3$  | $52.87 \text{ W} \cdot \text{m}^{-3}$ | $10.08 \text{ W} \cdot \text{m}^{-3}$ | 500 M $\Omega$    | [1]              |
| Self-assembly<br>TENG | $2.68 \times 10^{-4} \text{ m}^3$ | $32.6 \text{ W} \cdot \text{m}^{-3}$  | $8.69 \text{ W} \cdot \text{m}^{-3}$  | 1 G $\Omega$      | [2]              |
| TCE-TENG              | $3.2 \times 10^{-3} \text{ m}^3$  | $67.2 \text{ W} \cdot \text{m}^{-3}$  | $21 \text{ W} \cdot \text{m}^{-3}$    | 100 M $\Omega$    | <b>This Work</b> |

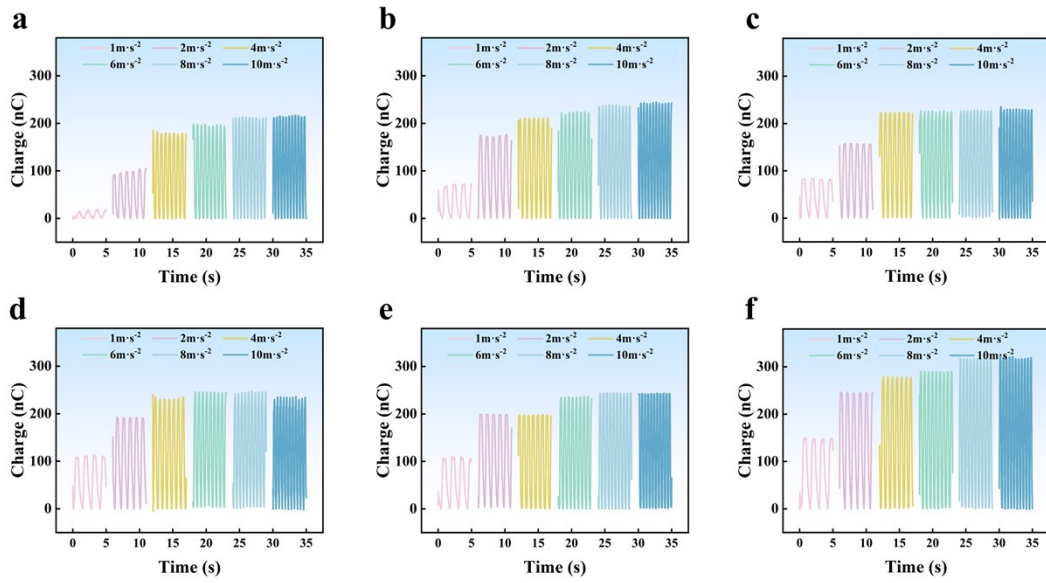

**Fig. S1** The transferred charge of the single-layer TENGs. (a) PVC/Cu. (b) PVC/Cu/POM. (c) PA/Cu. (d) PA/Cu/PTFE. (e) PTFE/Cu. (f) PTFE/Cu/POM.

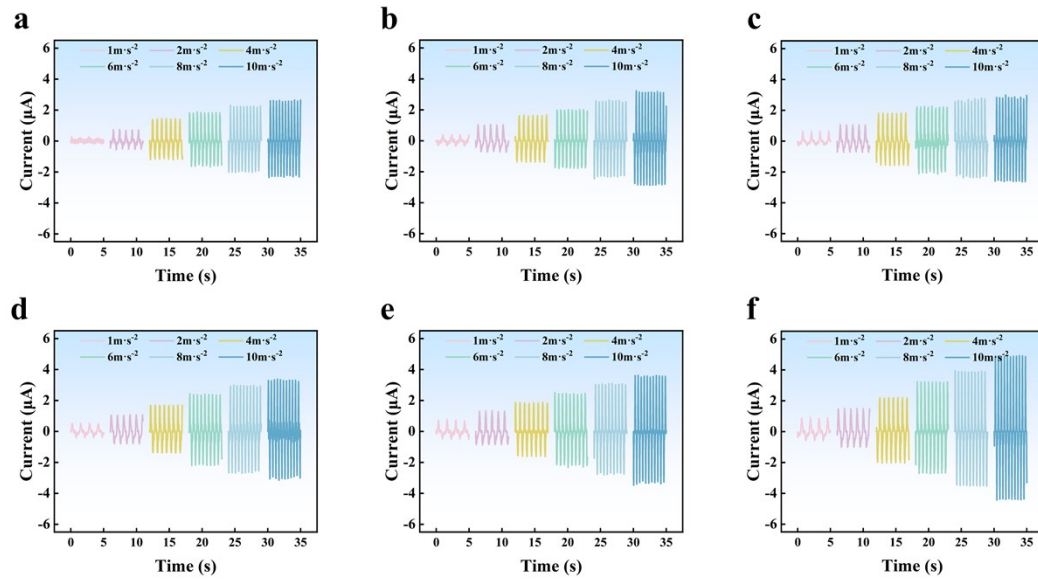

**Fig. S2** The short-circuit current of the single-layer TENGs. (a) PVC/Cu. (b) PVC/Cu/POM. (c) PA/Cu. (d) PA/Cu/PTFE. (e) PTFE/Cu. (f) PTFE/Cu/POM.

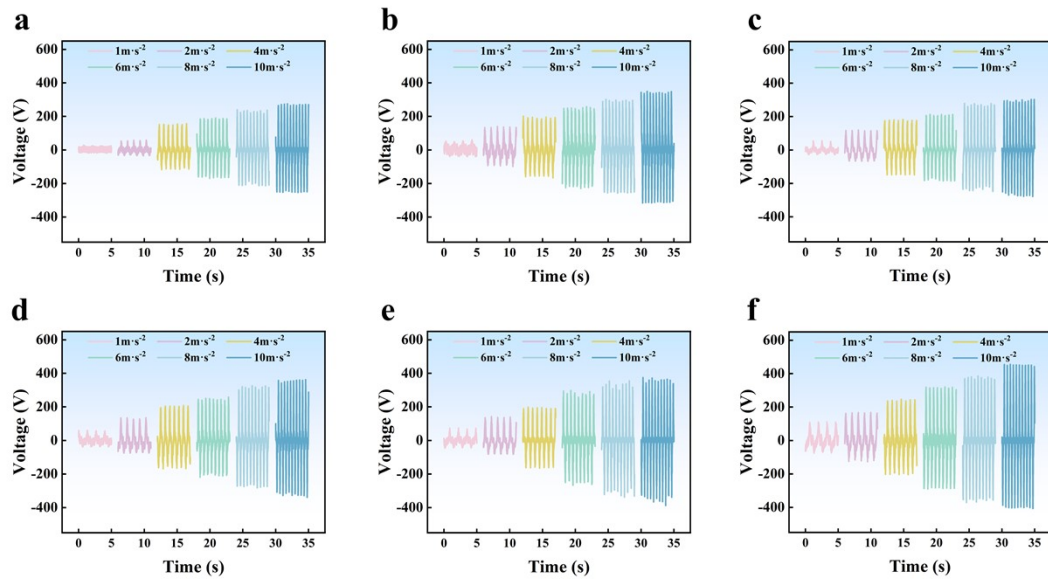

**Fig. S3** The open-circuit voltage of the single-layer TENGs. (a) PVC/Cu. (b) PVC/Cu/POM. (c) PA/Cu. (d) PA/Cu/PTFE. (e) PTFE/Cu. (f) PTFE/Cu/POM.

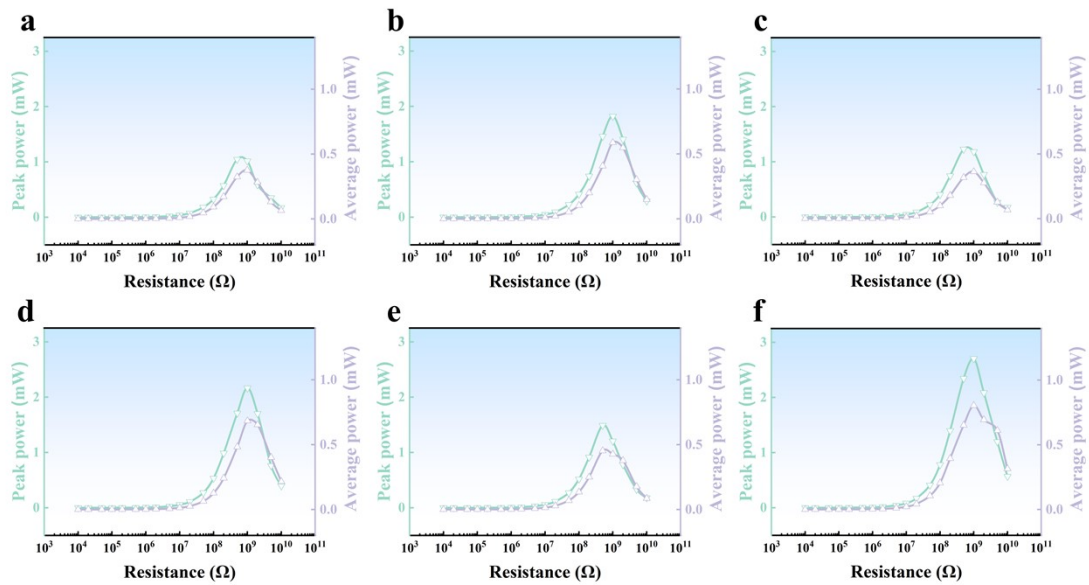

**Fig. S4** The peak and average power of the single-layer TENGs. (a) PVC/Cu. (b) PVC/Cu/POM. (c) PA/Cu. (d) PA/Cu/PTFE. (e) PTFE/Cu. (f) PTFE/Cu/POM.

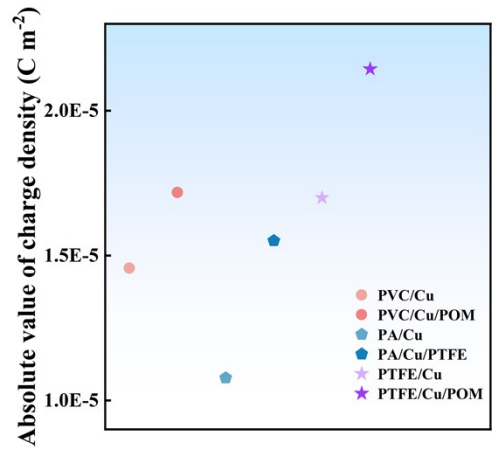

**Fig. S5** Faraday cup-derived surface charge density of dielectric spheres from six TENG devices after sufficient operation cycles.

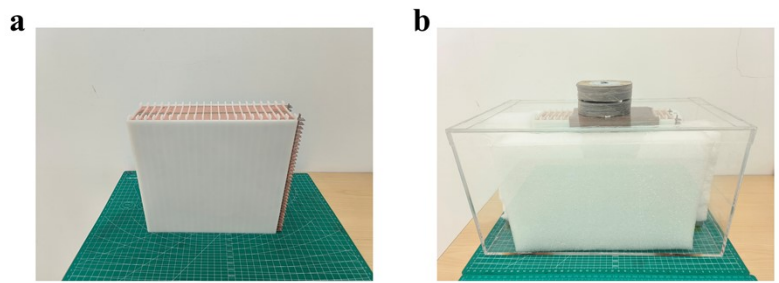

**Fig. S6** (a) Photograph of the TCE-TENG. (b) Photograph of the TCE-TENG encapsulated within an acrylic box.

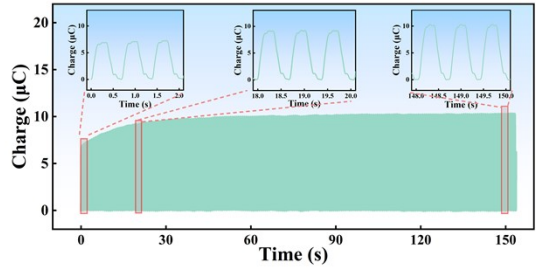

**Fig. S7** The transferred charge accumulation process upon initial mechanical excitation.

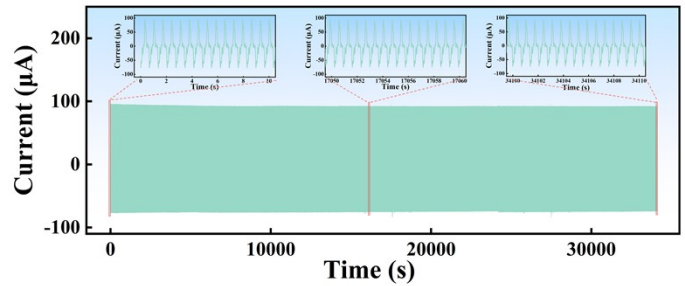

**Fig. S8** The long-term stability test of the TCE-TENG.

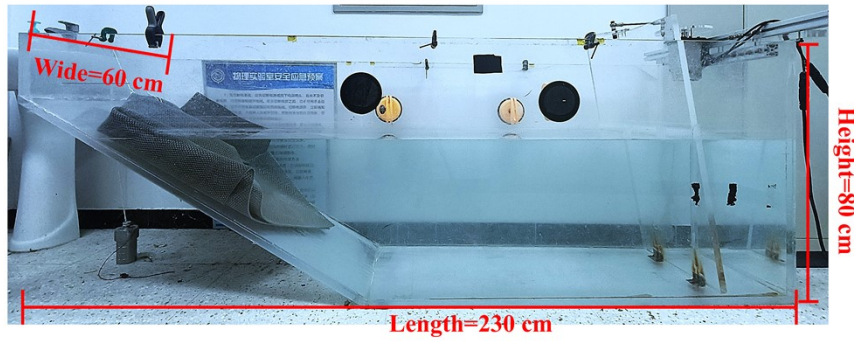

**Fig. S9** Photograph of the laboratory wave generator.

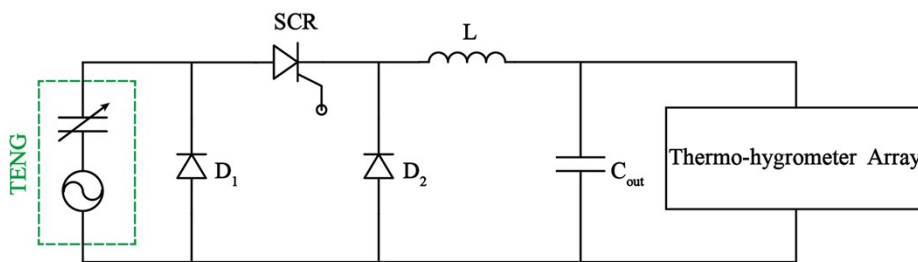

**Fig. S10** Circuit Diagram of the TCE-TENG Powering a Temperature and Humidity Sensor Array through the PMC.

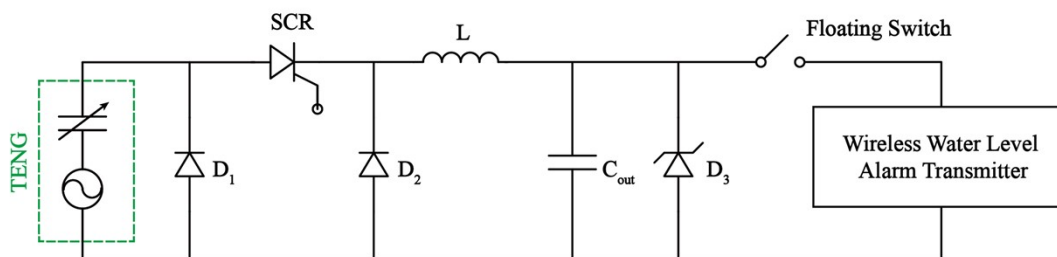

**Fig. S11** Circuit Diagram of the TCE-TENG Powering a water level alarm system through the PMC.

## References

1. Y. X. Duan, H. X. Xu, S. J. Liu, P. F. Chen, X. Y. Wang, L. Xu, T. Jiang and Z. L. Wang, *Nano Res.*, 2023, 16, 11646-11652.
2. X. D. Yang, L. Xu, P. Lin, W. Zhong, Y. Bai, J. J. Luo, J. Chen and Z. L. Wang, *Nano Energy*, 2019, 60, 404-412.
